# Supplementary material for: 3D Printed Silicone Meniscus Implants: Influence of the 3D Printing Process on Properties of Silicone Implants
Source: PubMed Central journal article supplement (PMC7570003; doi:10.3390/polym12092136), 2020-09-18
Supplement: polymers-12-02136-s001.pdf [file polymers-12-02136-s001.pdf]

## Supporting Information

### **3D Printed Silicone Meniscus Implants: Influence of the 3D Printing Process on Properties of Silicone Implants**

*Eric Luis<sup>1</sup>, Houwen Matthew Pan<sup>2</sup>, Anil Bastola<sup>1</sup>, Ram Bajpai<sup>3</sup>, Swee Leong Sing<sup>1</sup>, Juha Song<sup>2</sup>, and Wai Yee Yeong<sup>1</sup>, \**

<sup>1</sup>Singapore Centre for 3D Printing, School of Mechanical and Aerospace Engineering, Nanyang Technological University, 50 Nanyang Drive, Singapore 639798  
Email: [wyyeong@ntu.edu.sg](mailto:wyyeong@ntu.edu.sg)

<sup>2</sup>School of Chemical and Biomedical Engineering, Nanyang Technological University, 70 Nanyang Drive, Singapore 639798

<sup>3</sup>Center for Population Health Sciences, Lee Kong Chien School of Medicine, Nanyang Technological University, 11 Mandalay Road, Singapore 308232

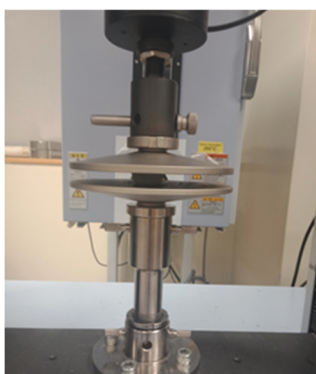

**Figure S1.** Compression plates set-up used for static compression test.

a) Molded Silicone Implant

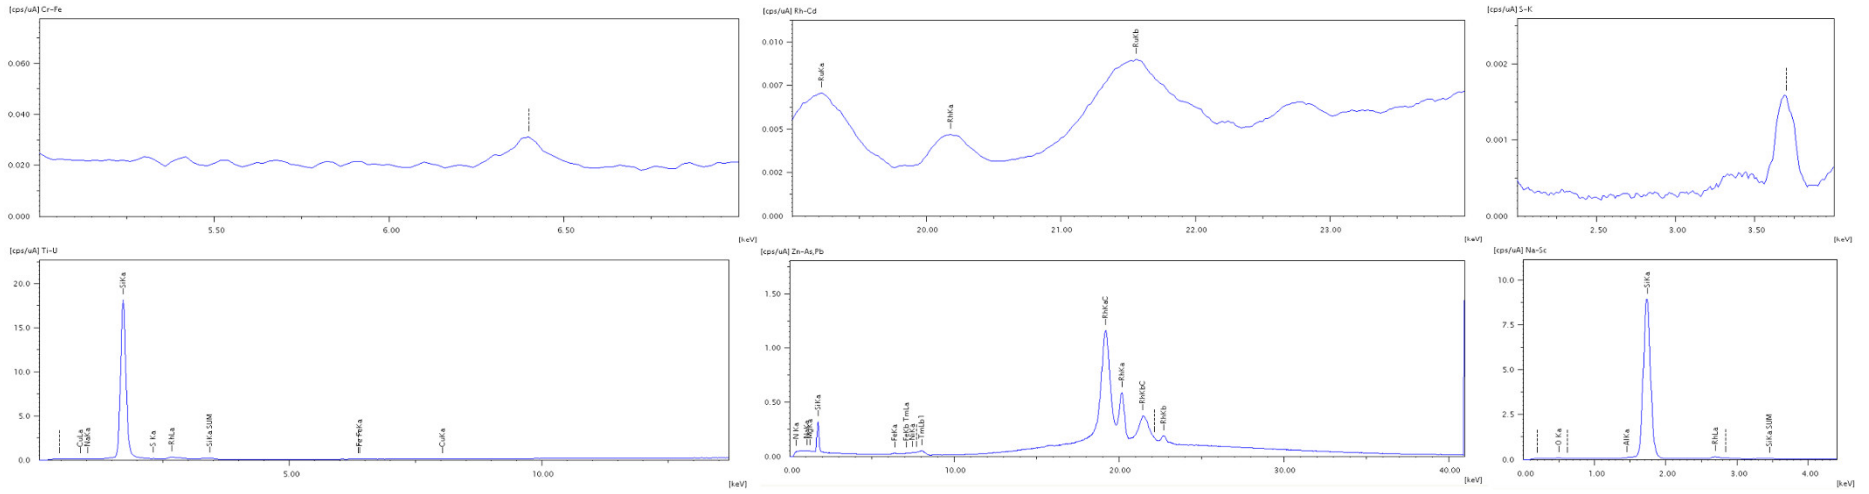

b) 3DP Silicone Implant

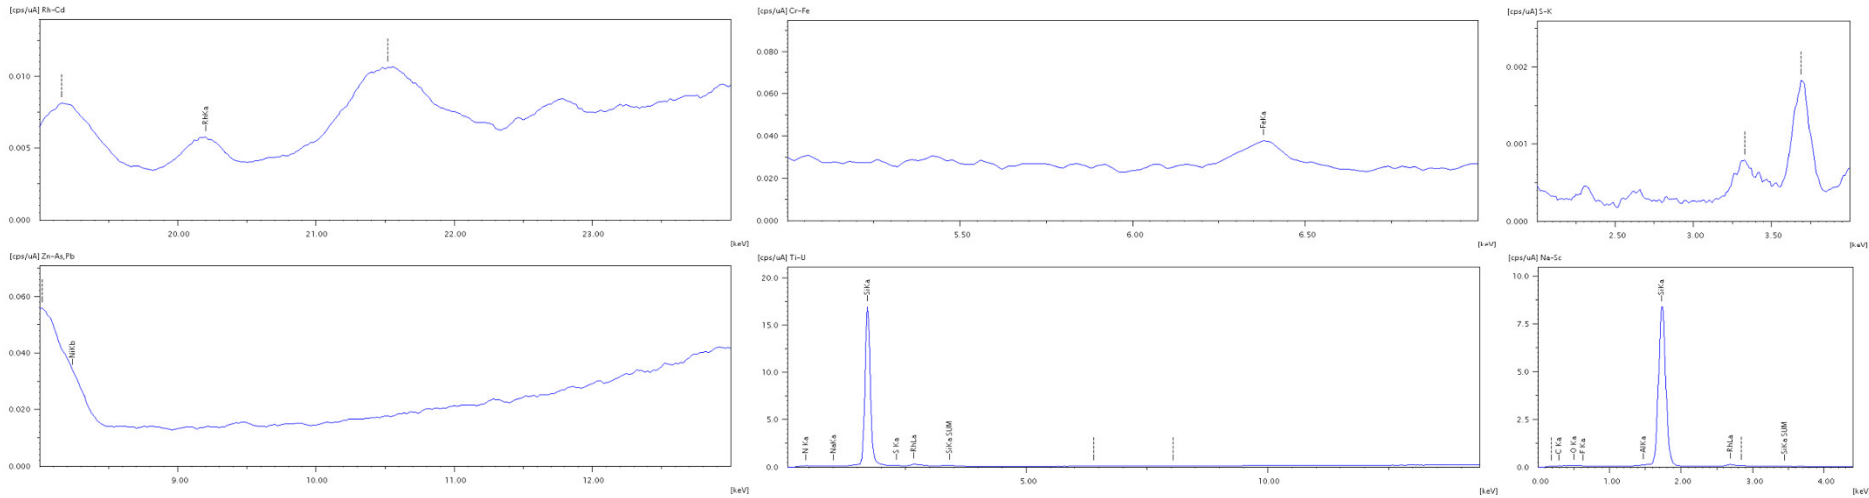

Figure S2. XPS spectra of (a) molded and (b) 3D printed silicone implant.

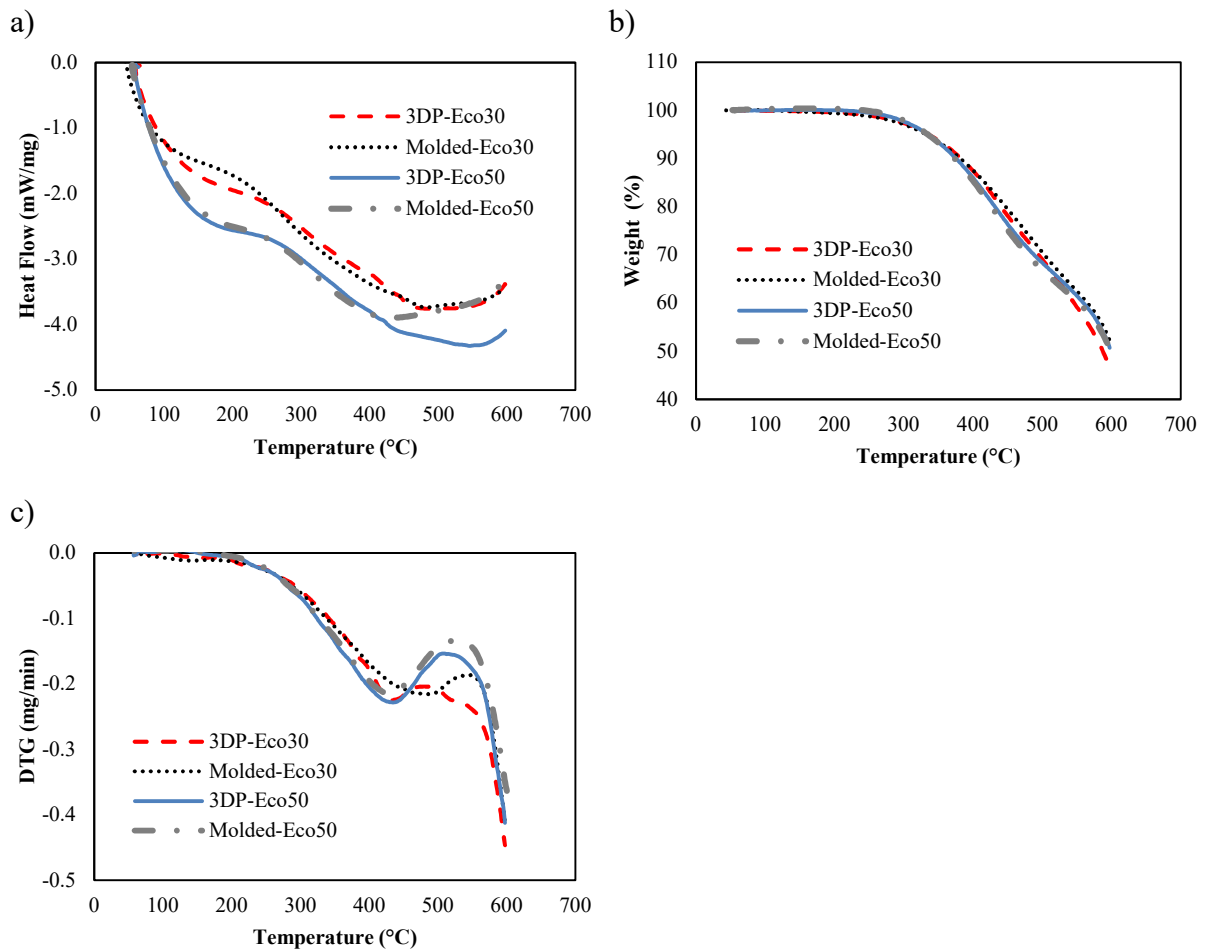

**Figure S3.** Combined (a) DSC, (b) TGA, and (c) DTG graphs of 3D Printed and Molded Eco30 and Eco50 samples.

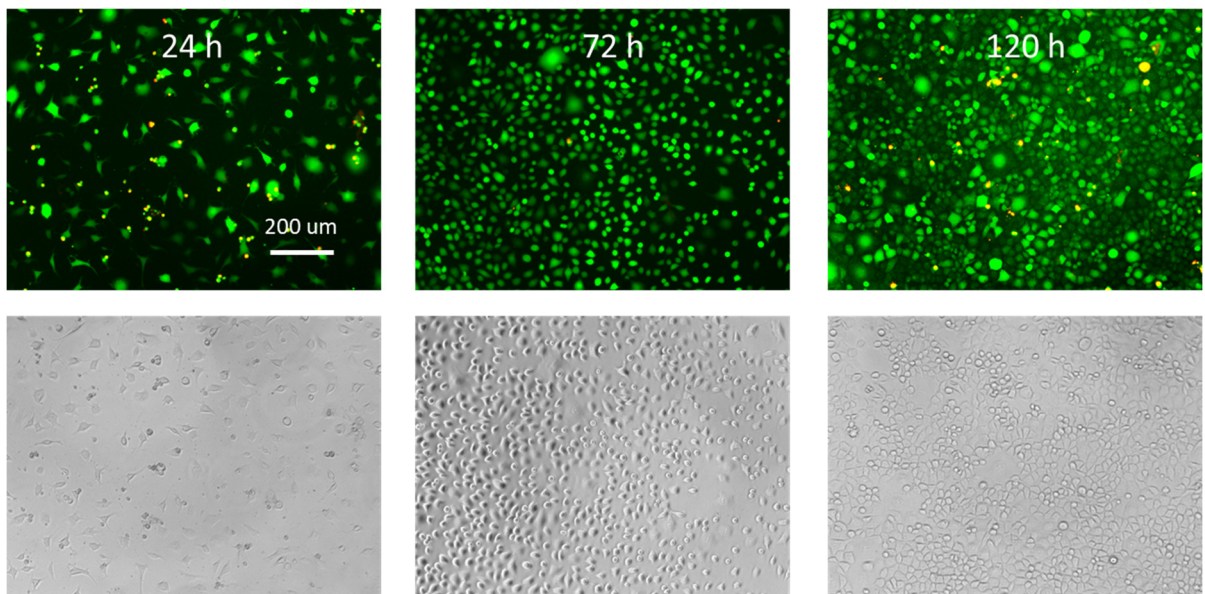

**Figure S4.** Fluorescent and corresponding optical images of L929 cells attached and proliferating on surfaces of 24-well cell culture plates after 24, 72, and 120 h culture. Cells were stained with the Live/Dead® cell viability assay.
